# Supplementary material
Source: ML conference proceedings conference paper supplement (https://openreview.net/forum?id=6Q5RdltG3L)
Supplement: supplementary_material [file attachment]

## **Terms of use for the PieAPP dataset**

This dataset contains 200 undistorted reference images derived from the Waterloo Exploration dataset (released with due permission from the Waterloo Exploration dataset authors) and the distorted versions of these reference images along with human pairwise preference labels for pairs of distorted images. Rights to the original reference images and derivatives are retained by the photographers.

We provide the access to the PieAPP dataset under the following terms:

1. Only non-commercial, educational or research use of the PieAPP dataset, source code, and associated material is permitted.
2. All users of the PieAPP dataset must also abide by the Copyright notice of the Waterloo Exploration dataset (mentioned below).
3. When using this dataset, please cite the PieAPP dataset as well as the Waterloo Exploration dataset.

Bibtex for PieAPP:

```
@InProceedings{Prashnani_2018_CVPR,  
  author = {Prashnani, Ekta and Cai, Hong and Mostofi, Yasamin and Sen, Pradeep},  
  title = {PieAPP: Perceptual Image-Error Assessment Through Pairwise Preference},  
  booktitle = {The IEEE Conference on Computer Vision and Pattern Recognition (CVPR)},  
  month = {June},  
  year = {2018}  
}
```

Bibtex for Waterloo Exploration database:

```
@article{ma2017waterloo,  
  author = {Ma, Kede and Duanmu, Zhengfang and Wu, Qingbo and Wang, Zhou and Yong, Hongwei and Li, Hongliang and Zhang, Lei},  
  title = {{Waterloo Exploration Database}: New Challenges for Image Quality Assessment Models},  
  journal = {IEEE Transactions on Image Processing},  
  volume = {26},  
  number = {2},  
  pages = {1004--1016},  
  month = {Feb.},  
  year = {2017}}
```

Copyright notice for the Waterloo Exploration dataset (as stated on the website

<https://ece.uwaterloo.ca/~k29ma/exploration/>) :

Rights to all images are retained by the photographers. For researchers and educators who wish to use the images for non-commercial research and/or educational purposes, we can provide access under the following terms:

1. Researcher shall use the Database only for non-commercial research and educational purposes.
2. University of Waterloo makes no representations or warranties regarding the Database, including but not limited to warranties of non-infringement or fitness for a particular purpose.
3. Researcher accepts full responsibility for his or her use of the Database and shall defend and indemnify University of Waterloo, including their employees, Trustees, officers and agents, against any and all claims arising from Researcher's use of the Database, including but not limited to Researcher's use of any copies of copyrighted images that he or she may create from the Database.
4. Researcher may provide research associates and colleagues with access to the Database provided that they first agree to be bound by these terms and conditions.
5. University of Waterloo reserves the right to terminate Researcher's access to the Database at any time.
6. If Researcher is employed by a for-profit, commercial entity, Researcher's employer shall also be bound by these terms and conditions, and Researcher hereby represents that he or she is fully authorized to enter into this agreement on behalf of such employer.
